# Supplementary material
Source: HighWire-hosted journal article supplement (http://www.jrheum.org/highwire/filestream/33242/field_highwire_adjunct_files/0/170366_Data_Suppl.pdf)
Supplement: 170366_Data_Suppl.pdf [file 170366_Data_Suppl.pdf]

**Supplementary Table 1.** Baseline characteristics by enrollment status.

| Variable                                                | Level                        | Did not enroll<br>(n=23)      | Enrolled<br>(n=120)            | p-value          |
|---------------------------------------------------------|------------------------------|-------------------------------|--------------------------------|------------------|
| Age at baseline                                         | Years                        | 63.6±10.8<br>n=22             | 61.7±10.7                      | 0.45             |
| Sex                                                     | Female                       | 16 (73%)                      | 99 (83%)                       | 0.37             |
| Race                                                    | White                        | 17 (81%)                      | 95 (81%)                       | 0.10             |
|                                                         | Black or African American    | 1 (5%)                        | 12 (10%)                       |                  |
| Duration of symptoms                                    |                              | 11.1 [5.0, 27.0]<br>n=16      | 14.8 [6.8, 24.8]<br>n=116      | 0.54             |
| <b>RF Result Interpretation</b>                         | <b>Positive</b>              | <b>4 (17%)</b>                | <b>51 (43%)</b>                | <b>0.007</b>     |
| <b>Anti-CCP Interpretation</b>                          | <b>Positive</b>              | <b>4 (17%)</b>                | <b>51 (43%)</b>                | <b>0.015</b>     |
| <b>Is the participant currently using methotrexate?</b> | <b>Yes</b>                   | <b>4 (20%)</b>                | <b>62 (52%)</b>                | <b>0.008</b>     |
| <b>Is the participant currently taking a biologic?</b>  | <b>Yes</b>                   | <b>4 (20%)</b>                | <b>61 (51%)</b>                | <b>0.014</b>     |
| <b>RADAI, adjusted</b>                                  |                              | <b>4.0 [0.0, 8.0]</b>         | <b>8.0 [5.0, 15.0]</b>         | <b>&lt;0.001</b> |
| <b>DAS28-ESR</b>                                        |                              | <b>2.7±1.8</b><br><b>n=13</b> | <b>3.7±1.5</b><br><b>n=109</b> | <b>0.026</b>     |
| RAPID3                                                  |                              | 15.7 [13.5, 17.9]<br>n=16     | 16.0 [12.2, 19.0]<br>n=116     | 0.82             |
| CRP result                                              | mg/dL (0 if below detection) | 1.0 [0.0, 1.2]<br>n=16        | 1.2 [0.0, 2.1]<br>n=115        | 0.24             |
| ESR result                                              | mm/hr                        | 10.0 [6.0, 31.0]<br>n=15      | 13.0 [5.0, 26.0]<br>n=117      | 0.88             |

**Supplementary Table 2.** Baseline characteristics of knee v. hip patients.

| Variable                                             | Level                                             | Hip<br>(n=53)     | Knee<br>(n=67)    | p-value |
|------------------------------------------------------|---------------------------------------------------|-------------------|-------------------|---------|
| Age at baseline                                      | Years                                             | 60.8±12.4         | 62.5±9.1          | 0.38    |
| Sex                                                  | Female                                            | 40 (75%)          | 59 (88%)          | 0.09    |
| Race                                                 | White                                             | 45 (85%)          | 50 (77%)          | 0.75    |
|                                                      | Black or African American                         | 4 (8%)            | 8 (12%)           |         |
| BMI                                                  | kg/m <sup>2</sup>                                 | 27.3 [25.3, 33.0] | 28.8 [23.7, 34.6] | 0.88    |
| Duration of symptoms                                 |                                                   | 12.1 [5.4, 24.5]  | 16.1 [8.9, 25.3]  | 0.30    |
|                                                      |                                                   | n=52              | n=64              |         |
| DAS28-ESR                                            |                                                   | 3.6±1.5           | 3.8±1.5           | 0.66    |
|                                                      |                                                   | n=47              | n=62              |         |
| RAPID3                                               |                                                   | 14.9±5.5          | 16.0±5.0          | 0.26    |
|                                                      |                                                   | n=52              | n=64              |         |
| RADAI, adjusted                                      |                                                   | 7.0 [5.0, 14.0]   | 9.0 [4.0, 16.0]   | 0.97    |
| Baseline CDAI                                        |                                                   | 19.0 [14.0, 23.0] | 17.0 [10.0, 27.0] | 0.52    |
|                                                      |                                                   | n=45              | n=59              |         |
| Is the participant currently using methotrexate?     | Yes                                               | 30 (57%)          | 32 (48%)          | 0.46    |
| Is the participant currently using steroids?         | Yes                                               | 17 (32%)          | 22 (33%)          | 1.00    |
| Is the participant currently taking a biologic?      | Yes                                               | 25 (47%)          | 36 (55%)          | 0.46    |
| Is the participant currently taking any other DMARD? | Yes                                               | 15 (28%)          | 19 (29%)          | 1.00    |
| RA criteria:                                         | Meets BOTH criteria                               | 17 (32%)          | 31 (46%)          | 0.10    |
|                                                      | Meets only 2010 criteria                          | 12 (23%)          | 20 (30%)          |         |
|                                                      | Meets only 1987 criteria                          | 10 (19%)          | 8 (12%)           |         |
|                                                      | Does not meet criteria, included by opinion of PI | 14 (26%)          | 8 (12%)           |         |
| Patients with flares                                 |                                                   | 36 (68%)          | 39 (58%)          | 0.34    |

**Supplementary Table 3.** Logistic regression to predict flare, all patients.

| Univariate variable, all patients                    | Level                                                                        | Odds ratio (95% CI)<br>for flare | p-value          |
|------------------------------------------------------|------------------------------------------------------------------------------|----------------------------------|------------------|
| Age at baseline                                      | Years                                                                        | 0.99 (0.95 - 1.02)               | 0.42             |
| Sex                                                  | Female                                                                       | 2.10 (0.81 - 5.45)               | 0.13             |
| Race                                                 | White                                                                        | 0.27 (0.07 - 1.00)               | 0.051            |
|                                                      | Minority                                                                     | 1.00 (reference)                 | --               |
| BMI                                                  | kg/m <sup>2</sup>                                                            | 1.04 (0.98 - 1.10)               | 0.18             |
| Have you ever smoked cigarettes?                     | Yes                                                                          | 1.23 (0.58 - 2.61)               | 0.58             |
| Highest level of education completed                 | College/university graduate or above or Some college/university or AA degree | 2.10 (0.70 - 6.25)               | 0.18             |
|                                                      | Graduated from high school/GED or equivalent, or Some secondary/high school  | 1.00 (reference)                 | --               |
| <b>RA criteria:</b>                                  | <b>Meets BOTH criteria</b>                                                   | <b>5.89 (1.96 - 17.66)</b>       | <b>0.002</b>     |
|                                                      | Meets only 2010 criteria                                                     | 2.92 (0.95 - 8.99)               | 0.06             |
|                                                      | Meets only 1987 criteria                                                     | 2.19 (0.61 - 7.81)               | 0.23             |
|                                                      | <b>Does not meet criteria, included by opinion of PI</b>                     | <b>1.00 (reference)</b>          | <b>--</b>        |
| Is the participant currently using methotrexate?     | Yes                                                                          | 0.92 (0.44 - 1.94)               | 0.83             |
| Is the participant currently using steroids?         | Yes                                                                          | 1.88 (0.82 - 4.30)               | 0.13             |
| Is the participant currently taking a biologic?      | Yes                                                                          | 1.80 (0.85 - 3.80)               | 0.13             |
| Is the participant currently taking any other DMARD? | Yes                                                                          | 1.68 (0.71 - 3.95)               | 0.23             |
| Intra-op steroids?                                   | Yes                                                                          | 1.14 (0.37 - 3.44)               | 0.82             |
| RF Result Interpretation                             | Positive                                                                     | 1.66 (0.77 - 3.57)               | 0.20             |
|                                                      | Negative                                                                     | 1.00 (reference)                 | --               |
| Anti-CCP Interpretation                              | Positive                                                                     | 1.75 (0.80 - 3.78)               | 0.16             |
|                                                      | Negative                                                                     | 1.00 (reference)                 | --               |
| <b>KOOS Pain</b>                                     |                                                                              | <b>0.95 (0.91 - 0.99)</b>        | <b>0.009</b>     |
| <b>KOOS Activity</b>                                 |                                                                              | <b>0.96 (0.93 - 0.99)</b>        | <b>0.017</b>     |
| Duration of symptoms, square root                    |                                                                              | 0.97 (0.77 - 1.23)               | 0.83             |
| <b>DAS28-ESR</b>                                     | > 2.6 to ≤ 3.2                                                               | 0.36 (0.06 - 1.99)               | 0.240            |
|                                                      | > 3.2 to ≤ 5.1                                                               | <b>4.27 (1.59 - 11.46)</b>       | <b>0.004</b>     |
|                                                      | > 5.1                                                                        | <b>25.59 (2.93 - 223.92)</b>     | <b>0.003</b>     |
|                                                      | ≤ 2.3                                                                        | 1.00 (reference)                 | --               |
| <b>RAPID3</b>                                        |                                                                              | <b>1.18 (1.08 - 1.28)</b>        | <b>&lt;0.001</b> |
| CRP ≤ 1.0 mg/dL                                      | Yes                                                                          | 0.56 (0.26 - 1.19)               | 0.13             |
| <b>CRP ≤ 1.5 mg/dL</b>                               | <b>Yes</b>                                                                   | <b>0.29 (0.12 - 0.70)</b>        | <b>0.006</b>     |
| <b>CRP ≤ 2.0 mg/dL</b>                               | <b>Yes</b>                                                                   | <b>0.17 (0.06 - 0.54)</b>        | <b>0.002</b>     |
| <b>ESR result, age/sex specific normal</b>           | <b>Normal</b>                                                                | <b>0.30 (0.11 - 0.88)</b>        | <b>0.027</b>     |
| <b>MD HAQ</b>                                        |                                                                              | <b>1.42 (1.08 - 1.87)</b>        | <b>0.011</b>     |
